# Supplementary material
Source: PubMed Central journal article supplement (PMC7668163)
Supplement: pnas.2010301117.sapp.pdf [file pnas.2010301117.sapp.pdf]

# PNAS

[www.pnas.org](http://www.pnas.org)

Supplementary Information for

**Reversible auto-inhibitory regulation of *Escherichia coli* metallopeptidase BepA for selective  $\beta$ -barrel protein degradation**

Yasushi Daimon<sup>1</sup>, Shin-ichiro Narita<sup>1</sup>, Ryoji Miyazaki, Yohei Hizukuri, Hiroyuki Mori, Yoshiki Tanaka, Tomoya Tsukazaki, and Yoshinori Akiyama\*

<sup>1</sup>Equally contributed

\*Corresponding author: Yoshinori Akiyama  
Email: [yakiyama@infront.kyoto-u.ac.jp](mailto:yakiyama@infront.kyoto-u.ac.jp)

**This PDF file includes:**

Supplementary text  
Figures S1 to S8  
Table S1

## Supplementary Information Text

### Supplementary Results

#### **Isolation of the mutations that suppress self-degradation of BepA( $\Delta\alpha 9$ ) and BepA(H246A)**

We overexpressed and purified wild-type and the mutant forms of the BepA proteins with His<sub>10</sub>-tag at their C-terminus by metal-affinity chromatography. SDS/PAGE analysis of the eluted fraction of BepA( $\Delta\alpha 9$ ) and BepA(H246A) showed that the purified preparations contained less amounts of full-length BepA compared to wild-type BepA, with several faster-migrating proteins (Fig. 2A, lanes 5 and 11). Some of these faster-migrating species (such as 31.5 kDa and 15 kDa bands) possibly represent self-degradation products because their amounts increased upon incubation of the purified preparations with concomitant decrease in the amount of the full-length protein (Fig. 2A). N-terminal sequence analysis of the major fragment of about 30 kDa (Fig. 2A, blue arrowheads) showed that this fragment was a C-terminal part of BepA generated by cleavage between Ala-181 and Leu-182. To reduce the self-degradation, which was supposed to improve the yield of full-length BepA, we conducted random mutagenesis against the codons for A181 and L182 and screened for the mutants with decreased degradation (see *SI Appendix, Supplementary Materials and Methods* for details). We found that a pair of mutations (A181E/L182T) significantly suppresses the *in vivo* self-degradation of BepA( $\Delta\alpha 9$ ) and BepA(H246A) (Fig. 2A, lanes 7 and 13). The purified preparations of BepA( $\Delta\alpha 9$ ) and BepA(H246A) carrying the A181E/L182T mutations (represented as BepA( $\Delta\alpha 9$ )\* and BepA(H246A)\*, respectively) contained primarily full-length proteins (Fig. 2A, lanes 7 and 13), although incubation of these proteins for 8 h at 37°C still resulted in decrease in the amount of the full-length proteins and concomitant generation of faster migrating species. This conversion should also result from self-degradation because it was not observed with the BepA( $\Delta\alpha 9$ )\* and BepA(H246A)\* derivatives additionally having the active site mutation (H136R) (Fig. 2A), or when incubation was performed in the presence of a metal chelating reagent such as 1,10-phenanthroline or EDTA, inhibitors of zinc metallopeptidases (*SI Appendix, Fig. S5A*). N-terminal sequence analysis of a major self-degradation product of BepA( $\Delta\alpha 9$ )\* (Fig. 2A, green arrowhead) indicated that it was cleaved between Ala-171 and Met-172.

Comparison of the  $\square$ -casein degradation by BepA( $\Delta\alpha 9$ ) and BepA(H246A) with or without the A181E/L182T mutations showed that the A181E/L182T mutations had little effect on the proteolytic activity of the  $\Delta\alpha 9$  and the H246A mutants (*SI Appendix, Fig. S5D*). Also, time course-analysis showed that  $\square$ -casein degradation was observed even after most of BepA( $\Delta\alpha 9$ )\* was self-cleaved at the A171/M172 site (*SI Appendix, Fig. S6B*), suggesting that the self-cleaved BepA( $\Delta\alpha 9$ )\* remained proteolytically active.

### Supplementary Materials and Methods

#### **Bacterial strains, plasmids and media**

Strain SN896(DE3) was constructed by lysogenizing  $\lambda$ (DE3) into SN896. Derivatives of pUC-bepA or pCDF-bepA-his<sub>10</sub> encoding a mutant form of BepA were constructed by site-directed mutagenesis using pairs of complementary primers.

Derivatives of pSTD-bepA were constructed by site-directed mutagenesis or by subcloning an EcoRI-HindIII fragment of the pUC-bepA derivatives into the same sites of pSTD689. To construct pCDF-bepA(A181E/L182T) $\Delta$ (239-247)::GSGSGS-his<sub>10</sub>, the codons for Ala-181 and Leu-182 of the *bepA* gene on pCDF-bepA $\Delta$ (239-247)::GSGSGS-his<sub>10</sub> were mutagenized by site-directed mutagenesis using a pair of primers with randomized sequences for these codons. The plasmid library thus obtained was introduced into SN896(DE3) and the transformants were screened for the elevated accumulation of full-length BepA by immunoblotting. One of them that showed the highest accumulation level was stored and the DNA sequence of the *bepA* region was determined.

Unless indicated otherwise, cells were grown in L medium (10 g/L Bacto Tryptone, 5 g/L Bacto Yeast Extract and 5 g/L NaCl; pH was adjusted to 7.2 using NaOH) or M9 medium (without CaCl<sub>2</sub>).

Ampicillin (50 µg/mL) and spectinomycin (each of 50 µg/mL) were added as appropriate for selecting transformants and for growing plasmid-bearing strains.

### **SDS-PAGE and Immunoblotting Experiments**

Cells of SN56 and SN56/pTWV-lptD-his<sub>10</sub> additionally carrying a vector (pUC18 or pSTD689) or their derivatives encoding wild-type or a mutant form of BepA were grown to an early log phase at 37°C in M9 medium supplemented with 2 µg/ml thiamine, 0.2% maltose, 1 mM IPTG and either 19 amino acids other than Met or 18 amino acids other than Met and Cys. Proteins were precipitated with 5% trichloroacetic acid, washed with acetone, solubilized in SDS sample buffer with or without 2-mercaptoethanol and separated by 7.5% or 10% SDS-PAGE. Then, they were blotted onto a PVDF membrane filter (Merck Millipore; Billerica, MA, USA). The filter was blocked with 5% skimmed milk, and probed with anti-BepA, anti-LptD, or anti-DegP antiserum followed by HRP-conjugated anti-rabbit goat antibody. The proteins recognized by the antibodies were visualized using ECL Prime Western Blotting Detection Reagents (GE Healthcare) and a lumino-image analyzer (LAS-4000mini; Fujifilm).

### **Pulse-Chase and Immunoprecipitation Experiments**

SN56 carrying pUC18 or its derivative encoding wild-type or a mutant form of BepA were grown at 30 or 37°C to an early log phase in M9 medium supplemented with 18 amino acids other than Met and Cys, 2 µg/ml thiamine, and 0.2% maltose. Then the cells were induced with 1 mM (final conc.) IPTG for the appropriate time periods, labeled with 370 kBq/ml [<sup>35</sup>S]-Met (American Radiolabeled Chemicals) for 3 min at 30 or 37°C, and chased with 0.07% (final conc.) cold Met. At the indicated time points, a portion of the cultures were withdrawn and mixed with the same volume of 10% trichloroacetic acid to precipitate proteins. The proteins were dissolved in 50 µl of 50 mM Tris·HCl (pH 8.1) containing 1% SDS and 1 mM EDTA, boiled for 5 min, and diluted with 1 ml of Triton buffer containing 50 mM Tris·HCl (pH 8.1), 150 mM NaCl, 2% (wt/vol) Triton X-100, and 0.1 mM EDTA. After removal of insoluble materials by centrifugation at 20,000 × g for 5 min, the supernatant was subjected to immunoprecipitation with anti-LptD antiserum and Dynabeads Protein A (Invitrogen). Proteins recovered with the antibody were eluted from beads by boiling for 5 min in SDS sample buffer without 2-mercaptoethanol, separated by 7.5% SDS/PAGE, and visualized with with BAS-1800 (Fujifilm). Where specified, the eluted samples were further treated with 10% (final conc.) 2-mercaptoethanol before SDS/PAGE. Proteins were separated by 7.5% SDS/PAGE, and visualized with with BAS-1800 (Fujifilm). Band intensities were quantified by using MultiGauge software (Fujifilm).

### **Purification of BepA.**

SN896(DE3) cells carrying pCDF-bepA-his<sub>10</sub> derivatives were grown in L medium at 30°C. When the culture OD (at 600 nm) reached 0.2, expression of the BepA derivatives was induced with 75 µM IPTG for 2 h. Cells were then harvested, washed once with 5 mM Tris·HCl (pH 8.0), and resuspended in 5 mM Tris·HCl (pH 8.0) containing 300 mM sucrose, 10 µg/ml DNase I and cOmplete™ EDTA-free Protease Inhibitor Cocktail (Roche). They were converted into spheroplasts by addition of 50 µg/ml lysozyme and 1 mM EDTA followed by incubation for 20 min at 4°C. After addition of 2 mM MgCl<sub>2</sub>, the spheroplasts and insoluble materials were removed by successive centrifugations at 10,000 × g for 5 min and at 100,000 × g for 30 min to obtain the periplasmic fraction. The periplasmic fraction was applied to a TALON metal affinity resin (Clontech) column. The column was successively washed with buffer A [5 mM Tris·HCl (pH 8.0), 50 mM NaCl] and buffer A containing 5 mM imidazole, and finally eluted with buffer A containing 250 mM imidazole. The buffer of eluted fraction was exchanged to 5 mM Tris·HCl (pH 8.0) containing 10% glycerol by passage through a Sephadex G-25 desalting column (PD-10; GE Healthcare), followed by concentration by the Amicon® Ultra centrifugal filters (Millipore). Protein concentration of purified proteins was determined using the Bio-Rad Bradford protein assay.

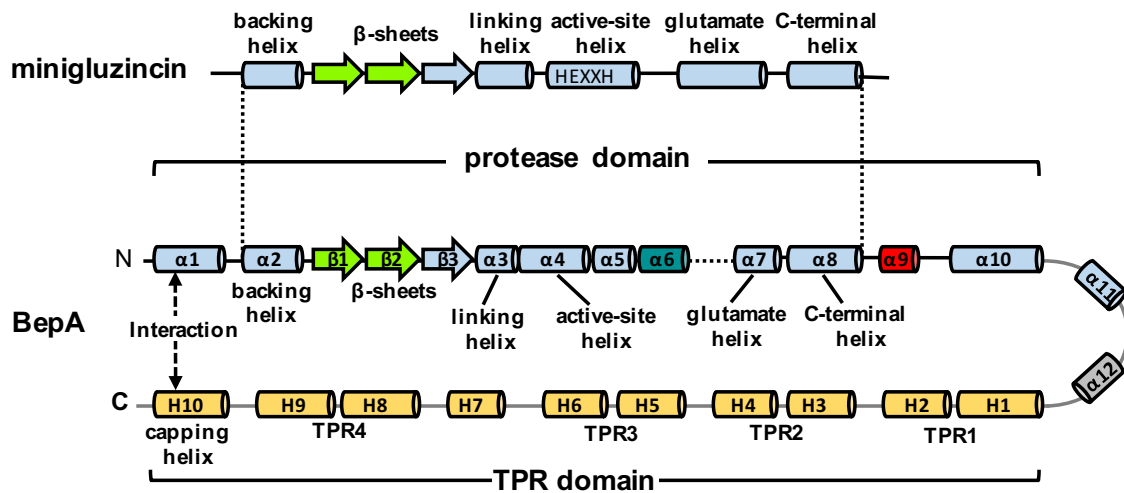

**Fig. S1.** Comparison of the secondary structure arrangements between minigluzincin and BepA. The secondary structure arrangements of the BepA (15) and minigluzincin (23) are schematically depicted. Arrows and rods indicate  $\beta$ -strands and  $\alpha$ -helices, respectively, and colored as in Fig. 1A.

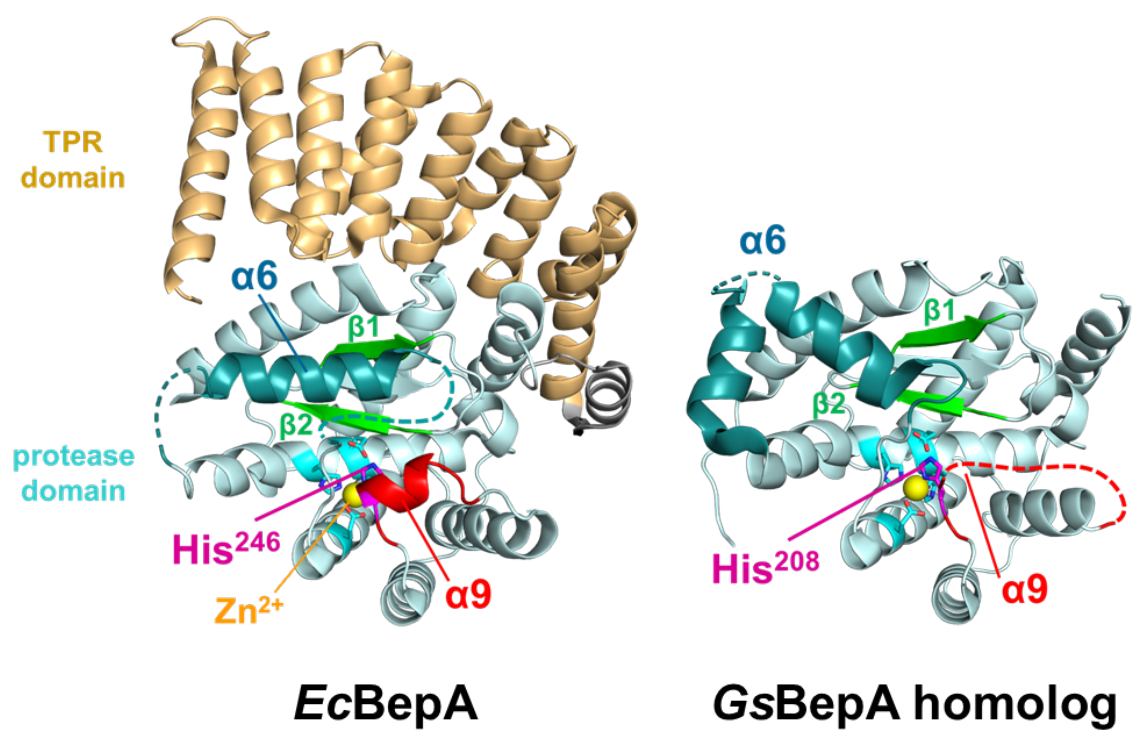

**Fig. S2.** Structures of *E. coli* BepA (PDB ID: 6AIT) and *G. sulfurreducens* BepA homolog (PDB ID 3C37). The regions corresponding to the  $\alpha 9$ /H246 loop (red),  $\alpha 6$  loop (teal),  $\beta 1$ / $\beta 2$  (light green), zinc atom (yellow) and His-246 residue (magenta) of *E. coli* BepA are colored as in Fig. 1A.

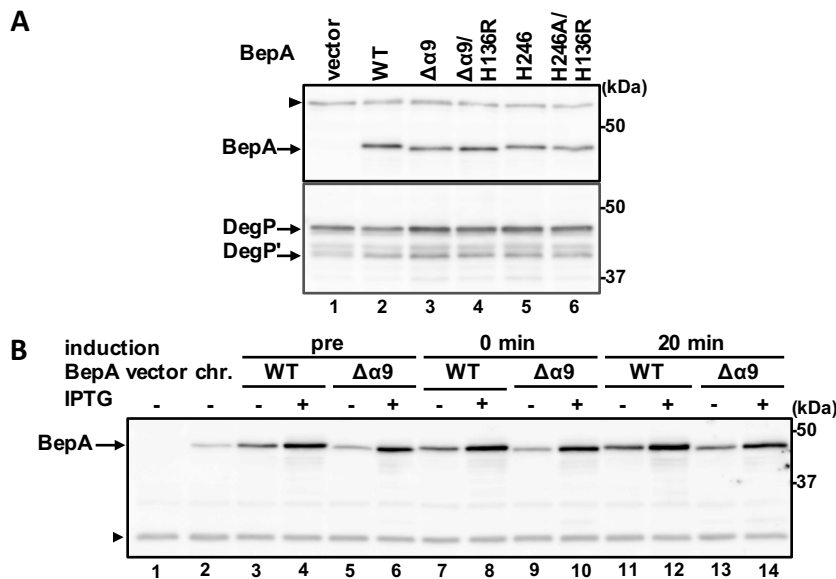

**Fig. S3.** Accumulation levels of BepA and DegP under the conditions of the pulse-chase experiments shown in Fig. 1. (A) Cells were grown and treated as in Fig. 1D except that they were not pulse-labeled. A portion was withdrawn at the time point corresponding to just before pulse-labeling or at 60 min chase for analysis of BepA and DegP, respectively. Proteins were acid-precipitated and subjected to SDS/PAGE and immunoblotting analysis with anti-BepA (upper panel) or anti-DegP (lower panel) antiserum. DegP' indicates the degradation products of DegP. The migration positions of molecular mass markers are shown. (B) Cells were grown and treated as in Fig. 1E except that they were not pulse-labeled. A portion was withdrawn at the time point corresponding to just before (IPTG -) or 15 minutes after (IPTG +) the induction for each culture. Proteins were acid-precipitated and subjected to SDS/PAGE and immunoblotting analysis with anti-BepA antiserum. Arrowheads indicate a non-specific band serving as a loading control. The representative results of two independent replicates are shown.

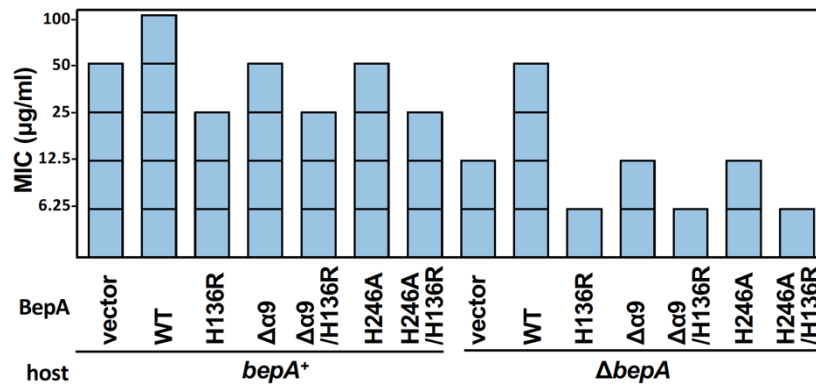

**Fig. S4.** Effects of expression of the  $\Delta\alpha 9$  and the H246A BepA mutants on the erythromycin sensitivity of the cells. Strains AD16 ( $\Delta bepA$ ) and SN56 ( $bepA^+$ ) carrying a plasmid encoding wild type or the indicated mutant form of BepA were grown to stationary phase in L medium with 0.1% glucose at 30°C. Under this condition, BepA would be expressed at a similar level to chromosomal BepA (1). The minimum inhibitory concentrations (MICs) were determined by spotting 5  $\mu$ l of the  $10^3$ -fold-diluted cultures on L-0.1% glucose agar plates supplemented with the various concentrations of erythromycin and incubating the plates at 30°C for 24 h, as reported previously (2). The representative results of two independent experiments are shown.

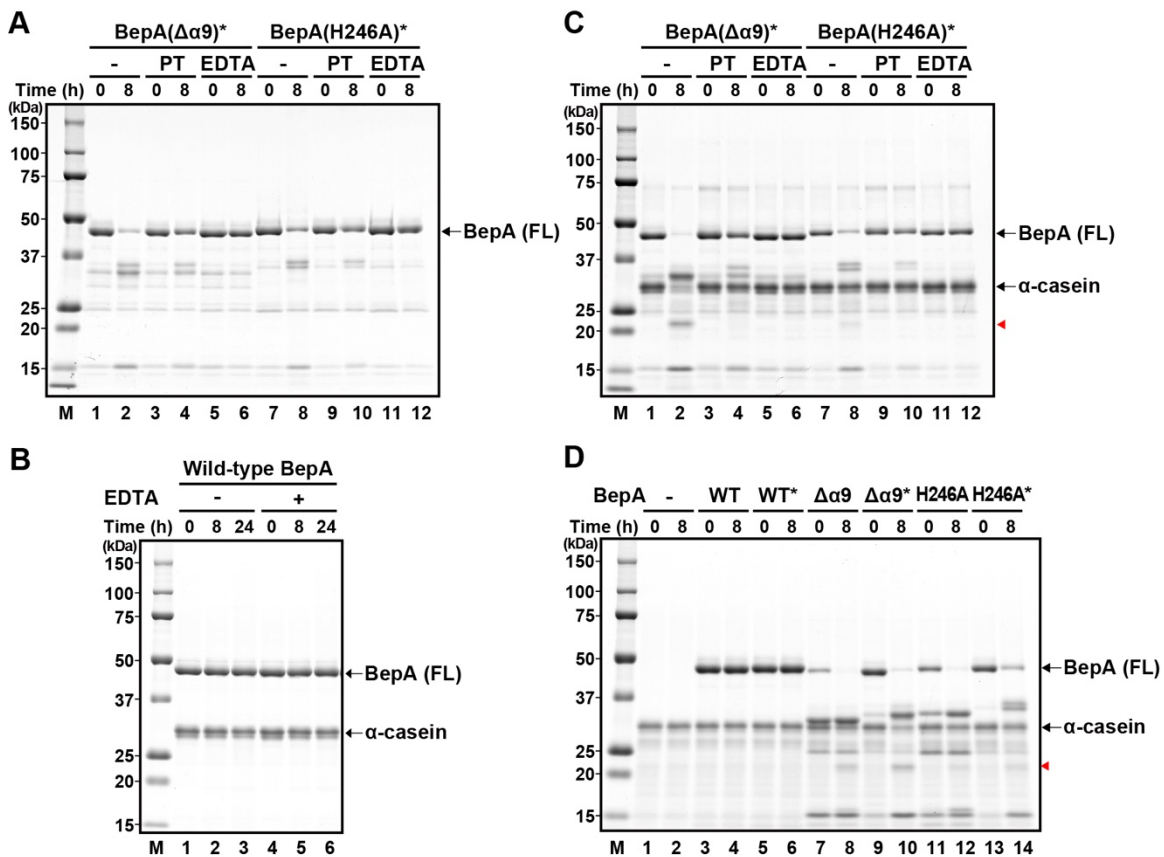

**Fig. S5.** Effects of metal chelators on the proteolytic activity of the  $\Delta\alpha 9$  and the H246A mutants. (A) Effects of metal chelators on the self-cleavage activity of BepA mutants were analyzed by incubating the BepA( $\Delta\alpha 9$ )\* or the BepA(H246A)\* protein, each carrying the A181E/L182T mutations, at 37°C in the absence (-) or presence of 250  $\mu$ M 1,10-phenanthroline (PT) or 250  $\mu$ M EDTA for 0 or 8 h, followed by SDS/PAGE and Coomassie Brilliant Blue G-250 (CBB) staining. (B) Wild-type BepA with a C-terminus His<sub>10</sub>-tag was incubated with  $\alpha$ -casein at 37°C in the absence (-) or presence (+) of 250  $\mu$ M EDTA for 0, 8 or 24 h and analyzed by SDS/PAGE and CBB staining. (C) Effects of metal chelators on the caseinolytic activity of BepA( $\Delta\alpha 9$ )\* or BepA(H246A)\* were analyzed as in B except that the reaction mixture contained  $\alpha$ -casein. (D) Effects of the A181E/L182T mutations on the caseinolytic activity of BepA were analyzed by incubating wild-type (WT) or the mutant forms of the BepA proteins, either with or without the A181E/L182T mutation, with  $\alpha$ -casein at 37°C for 0 or 8 h followed by SDS/PAGE and CBB staining. Red arrowheads indicate a degradation product of  $\alpha$ -casein.



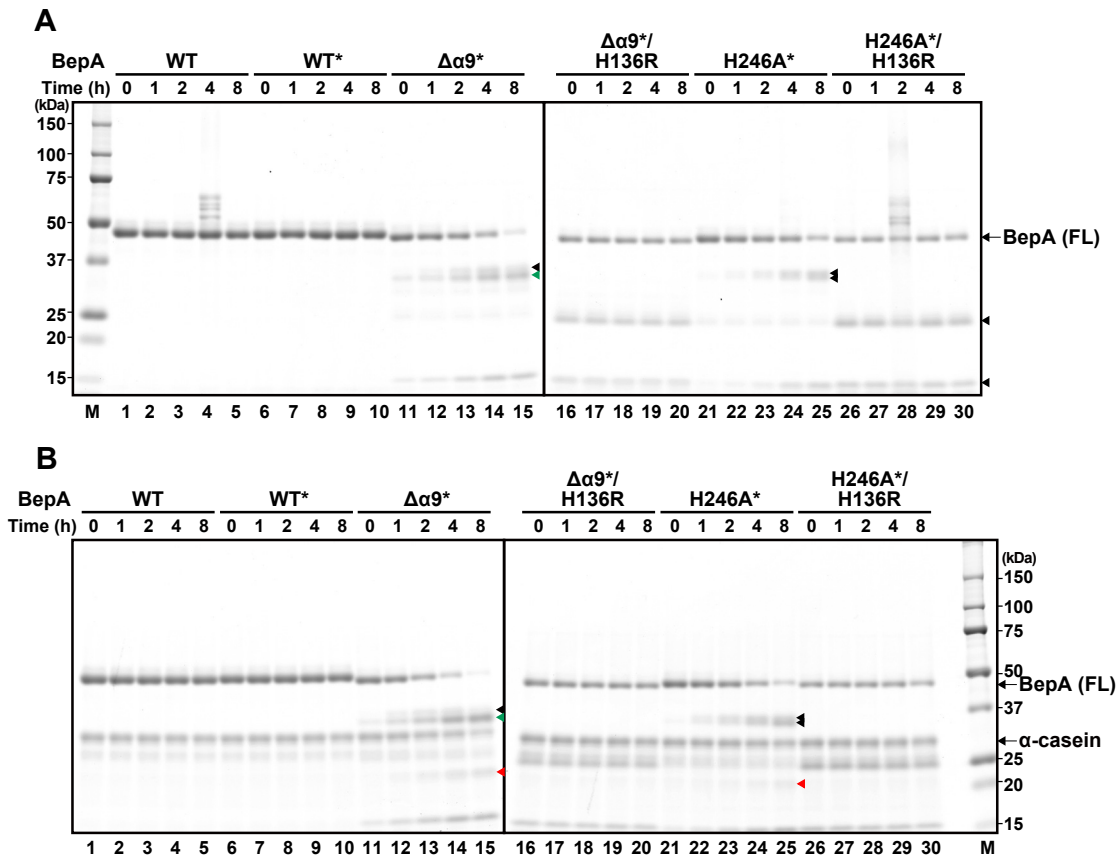

**Fig. S6.** Time course of  $\alpha$ -casein degradation by the  $\alpha 9$  and the H246 mutants of BepA. (A) Self-degradation of the  $\Delta\alpha 9$  and the H246A mutants. Wild-type (WT) or the indicated mutant forms of BepA with a C-terminal His<sub>10</sub>-tag were incubated at 37°C for 0, 1, 2, 4 or 8 h and analyzed by SDS/PAGE and CBB staining. BepA derivatives with the A181E/L182T mutations are indicated by asterisks. Full-length (FL) BepA derivatives are indicated. (B) Degradation of  $\alpha$ -casein by the BepA derivatives. Wild-type (WT) or the indicated mutant forms of BepA, carrying the A181E/L182T mutations (indicated by asterisks) and a C-terminal His<sub>10</sub>-tag, were incubated with  $\alpha$ -casein at 37°C for 0, 1, 2, 4 or 8 h and analyzed by SDS/PAGE and CBB staining. Full-length (FL) BepA derivatives and  $\alpha$ -casein are indicated. Proteolytic fragments of  $\alpha$ -casein are indicated by red arrowheads. The C-terminal fragments of BepA derivatives generated by cleavage between Ala-171 and Met-172 are indicated by green arrowheads. Other proteolytic fragments of BepA derivatives are indicated by black arrowheads.

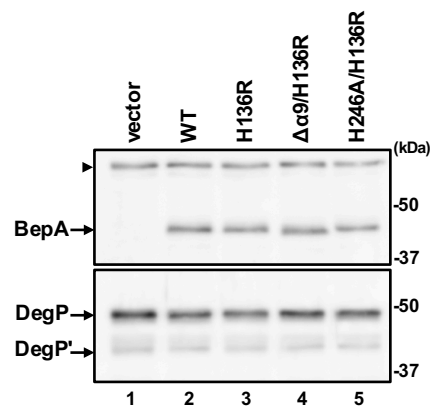

**Fig. S7.** Accumulation levels of BepA and DegP under the conditions of the pulse-chase experiments shown in Fig. 4. Cells were grown and treated as in Fig. 4 except that they were not pulse-labeled. A portion was withdrawn at the time point corresponding to just before pulse-labeling or at 20 min chase time for analysis of BepA (upper panel) and DegP (lower panel), respectively. Proteins were acid-precipitated and subjected to SDS/PAGE and immunoblotting analysis with anti-BepA or anti-DegP antiserum. Arrowhead indicates non-specific bands serving as a loading control. The representative results of two independent replicates are shown.



**Table S1: Strains and plasmids used in this study**

| <i>E. coli</i> strains                                                     | Genotype                                                                                                                    | Reference           |
|----------------------------------------------------------------------------|-----------------------------------------------------------------------------------------------------------------------------|---------------------|
| AD16                                                                       | $\Delta pro-lac\ thi^I\ F^+ lacI^{\Phi}\ Z\Delta M15\ Y^+ pro^+$                                                            | (3)                 |
| SN56                                                                       | AD16 $\Delta bepA::FRT$                                                                                                     | (4)                 |
| MC4100                                                                     | <i>araD139</i> $\Delta(argF-lac)U169$ <i>rpsL150</i> <i>relA1</i> <i>flbB5301</i><br><i>deoC1</i> <i>ptsF25</i> <i>rbsR</i> | (5)                 |
| SN896                                                                      | MC4100 $\Delta bepA::FRT$                                                                                                   | (4)                 |
| SN896(DE3)                                                                 | SN896, $\lambda DE3$                                                                                                        | (4)                 |
| Plasmids                                                                   | Description                                                                                                                 | Reference or source |
| pUC18                                                                      | Expression vector; $P_{lac}$ , <i>bla</i>                                                                                   | (6)                 |
| pUC-bepA                                                                   | pUC18 derivative encoding BepA                                                                                              | (4)                 |
| pUC-bepA(H136R)                                                            | pUC-bepA derivative, H136R                                                                                                  | (4)                 |
| pUC-bepA(E137Q)                                                            | pUC-bepA derivative, E137Q                                                                                                  | (4)                 |
| pUC-bepA $\Delta$ (239-247)::GSGSGS                                        | pUC-bepA derivative, $\Delta\alpha 9$                                                                                       | This study          |
| pUC-bepA(H136R) $\Delta$ (239-247)::GSGSGS                                 | pUC-bepA derivative, H136R, $\Delta\alpha 9$                                                                                | This study          |
| pUC-bepA(E137Q) $\Delta$ (239-247)::GSGSGS                                 | pUC-bepA derivative, E137Q, $\Delta\alpha 9$                                                                                | This study          |
| pUC-bepA(H246A)                                                            | pUC-bepA derivative, H246A                                                                                                  | This study          |
| pUC-bepA(H136R/H246A)                                                      | pUC-bepA derivative, H136R/H246A                                                                                            | This study          |
| pUC-bepA(E137Q/H246A)                                                      | pUC-bepA derivative, E137Q/H246A                                                                                            | This study          |
| pSTD689                                                                    | Expression vector; $P_{lac}$ , <i>aadA</i>                                                                                  | (7)                 |
| pSTD-bepA                                                                  | pSTD689 derivative encoding BepA                                                                                            | (2)                 |
| pSTD-bepA(H136R)                                                           | pSTD-bepA derivative, H136R                                                                                                 | This study          |
| pSTD-bepA $\Delta$ (239-247)::GSGSGS                                       | pSTD-bepA derivative, $\Delta\alpha 9$                                                                                      | This study          |
| pSTD-bepA(H136R) $\Delta$ (239-247)::GSGSGS                                | pSTD-bepA derivative, H136R, $\Delta\alpha 9$                                                                               | This study          |
| pSTD-bepA(H246A)                                                           | pSTD-bepA derivative, H246A                                                                                                 | This study          |
| pSTD-bepA(H136R/H246A)                                                     | pSTD-bepA derivative, H136R/H246A                                                                                           | This study          |
| pSTD-bepA(E103C)                                                           | pSTD-bepA derivative, E103C                                                                                                 | This study          |
| pSTD-bepA(E241C)                                                           | pSTD-bepA derivative, E241C                                                                                                 | This study          |
| pSTD-bepA(E103C/E241C)                                                     | pSTD-bepA derivative, E103C/E241C                                                                                           | This study          |
| pTWW228                                                                    | Expression vector; $P_{lac}$ , <i>bla</i>                                                                                   | (8)                 |
| pTWW-lptD-his <sub>10</sub>                                                | pTWW228 derivative encoding LptD-His <sub>10</sub>                                                                          | (2)                 |
| pCDFDuet-1                                                                 | Expression vector; PT7 <i>aadA</i>                                                                                          | Novagen             |
| pCDF-bepA-his <sub>10</sub>                                                | pCDFDuet-1 derivative encoding BepA-His <sub>10</sub>                                                                       | (4)                 |
| pCDF-bepA(A181E/L182T)-his <sub>10</sub>                                   | pCDFDuet-1 derivative, A181E/L182T                                                                                          | This study          |
| pCDF-bepA $\Delta$ (239-247)::GSGSGS-his <sub>10</sub>                     | pCDFDuet-1 derivative, $\Delta\alpha 9$                                                                                     | This study          |
| pCDF-bepA(A181E/L182T) $\Delta$ (239-247)::GSGSGS-his <sub>10</sub>        | pCDFDuet-1 derivative, A181E/L182T, $\Delta\alpha 9$                                                                        | This study          |
| pCDF-bepA(H136R)(A181E/L182T) $\Delta$ (239-247)::GSGSGS-his <sub>10</sub> | pCDFDuet-1 derivative, H136R/A181E/L182T, $\Delta\alpha 9$                                                                  | This study          |
| pCDF-bepA(H246A)-his <sub>10</sub>                                         | pCDFDuet-1 derivative, H246A                                                                                                | This study          |
| pCDF-bepA(A181E/L182T)(H246A)-his <sub>10</sub>                            | pCDFDuet-1 derivative, A181E/L182T/H246A                                                                                    | This study          |
| pCDF-bepA(H136R)(A181E/L182T)(H246A)-his <sub>10</sub>                     | pCDFDuet-1 derivative, H136R/A181E/L182T/H246A                                                                              | This study          |

**References for supplementary information**

1. M. Shahrizal *et al.*, Structural basis for the function of the  $\beta$ -barrel assembly-enhancing protease BepA. *J. Mol. Biol.* **431**, 625–635 (2019).
2. Y. Daimon *et al.*, The TPR domain of BepA is required for productive interaction with substrate proteins and the  $\beta$ -barrel assembly machinery complex. *Mol. Microbiol.* **106**, 760–776 (2017).
3. A. Kihara, Y. Akiyama, K. Ito, A protease complex in the *Escherichia coli* plasma membrane: HflKC (HflA) forms a complex with FtsH (HflB), regulating its proteolytic activity against SecY. *EMBO J.* **15**, 6122–6131 (1996).

4. S. Narita, C. Masui, T. Suzuki, N. Dohmae, Y. Akiyama, Protease homolog BepA (YfgC) promotes assembly and degradation of  $\beta$ -barrel membrane proteins in *Escherichia coli*. *Proc. Natl. Acad. Sci. U. S. A.* **110**, E3612–E3621 (2013).
5. T.J. Silhavy, M.L. Berman, L.W. Enquist, Experiments with gene fusions. *Cold Spring Harb. Lab. New York* (1984).
6. C. Yanisch-Perron, J. Vieira, J. Messing, Improved M13 phage cloning vectors and host strains: nucleotide sequences of the M13mp18 and pUC19 vectors. *Gene* **33**, 103–119 (1985).
7. K. Kanehara, K. Ito, Y. Akiyama, YaeL proteolysis of RseA is controlled by the PDZ domain of YaeL and a Gln-rich region of RseA. *EMBO J.* **22**, 6389–6398 (2003).
8. T. Taura, Y. Akiyama, K. Ito, Genetic analysis of SecY: Additional export-defective mutations and factors affecting their phenotypes. *Mol. Gen. Genet.* **243**, 261–269 (1994).
